1 **Autotrophic and mixotrophic metabolic network fluxes suggest versatile lifestyle for the**  
2 **anammox bacterium *Candidatus Kuenenia stuttgartiensis***

3  
4 Christopher E. Lawson<sup>1,\*</sup>, Rob M. de Graaf<sup>2</sup>, Guylaine Nuijten<sup>2</sup>, Tyler B. Jacobson<sup>3</sup>, Martin  
5 Pabst<sup>4</sup>, David M. Stevenson<sup>3</sup>, Mike S.M. Jetten<sup>2</sup>, Daniel R. Noguera<sup>1,5</sup>, Katherine D. McMahon<sup>1,3</sup>,  
6 Daniel Amador-Noguez<sup>3</sup>, Sebastian Luecker<sup>2,\*</sup>

7  
8 <sup>1</sup>Department of Civil and Environmental Engineering, University of Wisconsin-Madison,  
9 Madison, WI, USA

10 <sup>2</sup>Department of Microbiology, Institute for Water and Wetland Research, Radboud University,  
11 Nijmegen, the Netherlands

12 <sup>3</sup>Department of Bacteriology, University of Wisconsin-Madison, Madison, WI, USA

13 <sup>4</sup>Department of Biotechnology, Delft University of Technology, Delft, The Netherlands

14 <sup>5</sup>DOE Great Lakes Bioenergy Research Center, University of Wisconsin-Madison, Madison, WI,  
15 USA

16  
17 \*Corresponding authors: Christopher E. Lawson ([c.e.lawson.87@gmail.com](mailto:c.e.lawson.87@gmail.com)), Sebastian Luecker  
18 ([s.luecker@science.ru.nl](mailto:s.luecker@science.ru.nl))

19  
20  
21 **Abstract**

22 Anaerobic ammonium-oxidizing (anammox) bacteria mediate a key step in the biogeochemical  
23 nitrogen cycle and have been applied worldwide for the energy-efficient removal of nitrogen from  
24 wastewater. However, outside their core energy metabolism, little is known about the metabolic  
25 networks driving anammox bacterial anabolism and mixotrophy beyond genome-based  
26 predictions. Here, we experimentally resolved the central carbon metabolism of the anammox  
27 bacterium *Candidatus Kuenenia stuttgartiensis* using time-series <sup>13</sup>C isotope tracing,  
28 metabolomics, and isotopically nonstationary metabolic flux analysis (INST-MFA). Our findings  
29 confirm predicted metabolic pathways used for CO<sub>2</sub> fixation, central metabolism, and amino acid  
30 biosynthesis in *K. stuttgartiensis*, and reveal several instances where genomic predictions are not  
31 supported by *in vivo* metabolic fluxes. This includes the use of an incomplete oxidative  
32 tricarboxylic acid cycle, despite the genome not encoding a known citrate synthase. We also  
33 demonstrate that *K. stuttgartiensis* is able to directly assimilate formate via the Wood-Ljungdahl  
34 pathway instead of oxidizing it completely to CO<sub>2</sub> followed by reassimilation. In contrast, our  
35 data suggests that acetate is fully oxidized to CO<sub>2</sub> via reversal of the Wood-Ljungdahl pathway  
36 and partial TCA cycle activity, followed by reassimilation of the produced CO<sub>2</sub>. Together, these

1 findings highlight the versatility of central carbon metabolism in anammox bacteria and will enable  
2 the construction of accurate metabolic models that predict their function in natural and engineered  
3 ecosystems.

#### 4 5 **Main**

6 Anaerobic ammonium oxidation (anammox) is a key step in the biogeochemical nitrogen cycle  
7 and represents a novel treatment process for the sustainable removal of nitrogen from wastewater.  
8 The process is mediated by a deeply branching group of chemolithoautotrophic bacteria within the  
9 Planctomycetes, the Brocadiales, that couple the anaerobic oxidation of ammonium to nitrite  
10 reduction and dinitrogen gas formation<sup>1,2,3,4</sup>. The discovery of this unique metabolism and  
11 subsequent translation to full-scale applications represents one of the most rapid biotechnological  
12 advances in wastewater treatment<sup>5,6,7</sup>. However, the metabolic networks controlling anammox  
13 metabolism remain poorly understood, which limits the prediction of their function in natural and  
14 engineered ecosystems.

15 Metagenomic sequencing together with experimental studies have begun to unravel the  
16 metabolic potential of anammox bacteria<sup>2,3,8</sup>. A combination of molecular approaches have been  
17 used to reveal the key enzymes and reactions involved in anammox catabolism, which include  
18 hydrazine (N<sub>2</sub>H<sub>4</sub>) and nitric oxide (NO) as volatile intermediates in the anammox bacterium  
19 *Candidatus* Kuenenia stuttgartiensis (hereafter, *K. stuttgartiensis*)<sup>3,9,10</sup>. These reactions are  
20 localized within a specialized intracellular organelle, the anammoxosome, which is believed to be  
21 dedicated to energy conservation<sup>11,12</sup> and also contains membrane-bound respiratory complexes of  
22 *K. stuttgartiensis*' electron transport chain, including complex I, ATP synthase, and an  
23 NAD<sup>+</sup>:ferredoxin oxidoreductase (RNF)<sup>13</sup>. Experimental studies together with genomic evidence  
24 have also suggested that anammox bacteria are much more versatile than initially assumed, and  
25 can use alternative electron donors to ammonium, such as formate, acetate, and propionate for  
26 energy conservation with nitrite or nitrate as electron acceptors<sup>2,8,14,15,16,17</sup>. Intriguingly, it has been  
27 proposed that these organic substrates are fully oxidized to CO<sub>2</sub> and not directly assimilated into  
28 cell biomass, suggesting that anammox bacteria adhere to their autotrophic lifestyle<sup>4</sup>.

29 Based on measurements of cell carbon isotopic composition, genomic evidence, and gene  
30 expression data, it has been proposed that anammox bacteria fix CO<sub>2</sub> to acetyl-CoA via the Wood-  
31 Ljungdahl pathway<sup>2,4,18,19</sup>. Four additional carboxylation reactions are also predicted to

1 incorporate CO<sub>2</sub> into central carbon metabolism based on *K. stuttgartiensis*' genome annotations,  
2 catalyzed by pyruvate:ferredoxin oxidoreductase (PFOR), 2-oxoglutarate:ferredoxin  
3 oxidoreductase (OFOR), pyruvate carboxylase, and phosphoenolpyruvate carboxylase<sup>2,4</sup>. Products  
4 from these reactions are proposed to flow through the tricarboxylic acid (TCA) cycle,  
5 gluconeogenesis, and the pentose phosphate pathway to synthesize all biomass precursor  
6 metabolites<sup>2,4</sup>. Since *K. stuttgartiensis* apparently lacks a citrate synthase gene, it has been  
7 hypothesized that the TCA cycle operates in the reductive direction via OFOR to synthesize  
8 essential precursor metabolites, such as alpha-ketoglutarate<sup>4</sup>. However, these genome-based  
9 predictions of *K. stuttgartiensis*' metabolic network remain to be tested.

10 Here, we experimentally resolved the central carbon metabolism of a planktonic *K.*  
11 *stuttgartiensis* cell culture (more than 95% enriched) using time-series <sup>13</sup>C isotope tracing,  
12 metabolomics, and isotopically nonstationary metabolic flux analysis (INST-MFA). Our results  
13 show that several of the metabolic predictions summarized above, which were primarily based on  
14 genomic evidence, are not supported by the flux of metabolites experimentally observed. For  
15 instance, *K. stuttgartiensis* operates an incomplete oxidative TCA cycle despite having no  
16 predicted citrate synthase gene. We also demonstrate that *K. stuttgartiensis* is able to directly  
17 assimilate formate via the Wood-Ljungdahl pathway instead of oxidizing it to CO<sub>2</sub> before  
18 assimilation. On the contrary, we show that acetate is fully oxidized to CO<sub>2</sub> via a reversed Wood-  
19 Ljungdahl pathway and a partial TCA cycle, followed by reassimilation of the produced CO<sub>2</sub>.  
20 These findings highlight the versatility of carbon metabolism in *K. stuttgartiensis* and provide  
21 fundamental insights on the metabolic networks controlling anammox bacterial anabolism.

22

## 23 **Results**

24 **Mapping anammox autotrophic metabolism.** To elucidate the central carbon metabolic network  
25 of *K. stuttgartiensis* under chemolithoautotrophic growth conditions, we first performed time-  
26 series isotopic tracer experiments with <sup>13</sup>C-bicarbonate coupled to metabolomic analysis.  
27 Planktonic *K. stuttgartiensis* cells were cultivated under steady-state conditions in a continuous-  
28 flow membrane bioreactor using minimal media supplemented with ammonium and nitrite.  
29 Subsequently, <sup>13</sup>C-labelled bicarbonate was rapidly introduced into the bioreactor to a  
30 concentration of 30 mM (approximately 65% <sup>13</sup>C-dissolved inorganic carbon, DIC), which

1 incorporated into *K. stuttgartiensis*' metabolome over time. Samples were collected over a 3-hour  
2 period to trace metabolic network structure based on rates of metabolite  $^{13}\text{C}$ -enrichment.

3 Based on proposed carbon assimilation pathways for anammox bacteria<sup>2,4</sup>, we expected  
4 that  $\text{CO}_2$  fixation would largely occur through the Wood-Ljungdahl pathway and PFOR, resulting  
5 in fast labelling of acetyl-CoA and pyruvate, followed by phosphoenolpyruvate and other  
6 downstream metabolites. However, despite the almost immediate labeling of  
7 phosphoenolpyruvate,  $^{13}\text{C}$ -enrichment of acetyl-CoA and pyruvate was slow during the 3-hour  
8 experiment (Figure 1a; Figure 1b). One hypothesis for this observation is substrate channeling,  
9 where the product of one enzymatic reaction is directly passed to the next enzyme without  
10 opportunity to equilibrate within the cytoplasm<sup>20</sup>. Substrate channeling has been previously  
11 reported as a mechanism to protect highly labile intermediates of the Wood-Ljungdahl pathway<sup>21,22</sup>  
12 or regulate acetyl-CoA biosynthesis<sup>23</sup>, and in *K. stuttgartiensis* it could be combined with PFOR  
13 to form a channel from  $\text{CO}_2$  to phosphoenolpyruvate. An alternative explanation could be that  
14 different pools of acetyl-CoA and pyruvate exist through compartmentation. For example, the  
15 Wood-Ljungdahl pathway and PFOR activities could occur in one compartment or specific  
16 cytoplasmic location<sup>24</sup>, where other pools of acetyl-CoA and pyruvate that do not get labelled exist  
17 in another, diluting the overall  $^{13}\text{C}$  metabolite measurements. Consistent with the latter, amino  
18 acids synthesized from pyruvate (i.e., valine, and alanine) showed faster labelling and higher  $^{13}\text{C}$ -  
19 enrichment (Figure 1a; Figure 1b).

20 Acetyl-CoA and pyruvate are expected to enter the TCA cycle and gluconeogenesis to  
21 produce biomass precursors. Since *K. stuttgartiensis*' genome does not encode a citrate synthase  
22 required to operate the oxidative TCA cycle, it is hypothesized that synthesis of key precursor  
23 metabolites, including succinyl-CoA and alpha-ketoglutarate, occurs via the reductive direction<sup>4</sup>.  
24 If this hypothesis is correct, we would expect to observe high  $^{13}\text{C}$ -labelling of oxaloacetate,  
25 succinate, and alpha-ketoglutarate. While fast labeling of aspartic acid, which was used as a  
26 surrogate for oxaloacetate labelling, implied high activity of phosphoenolpyruvate (or pyruvate)  
27 carboxylase,  $^{13}\text{C}$ -labelling of succinate was much less and slower than the labelling of alpha-  
28 ketoglutarate (Figure 1b; Figure 1c). This suggested that OFOR and other reductive TCA cycle  
29 enzymes were not operating in *K. stuttgartiensis* to synthesize alpha-ketoglutarate.

30 Other biomass precursors are additionally predicted to be synthesized from  
31 gluconeogenesis and the pentose phosphate pathway in *K. stuttgartiensis*<sup>2</sup>. Consistent with this,

1 we observed fast  $^{13}\text{C}$ -labeling of the gluconeogenic intermediates 3-phosphoglycerate, fructose 6-  
2 phosphate, and glucose 6-phosphate, as well as pentose phosphate pathway intermediates, such as  
3 sedheptulose 7-phosphate and ribose 5-phosphate (Figure 1b; Figure 1c; Supplementary Dataset  
4 1).

5  
6  **$^{13}\text{C}$ -formate tracing confirms formate assimilation pathways and oxidative TCA cycle in *K.***  
7 ***stuttgartiensis*.** We further probed central carbon metabolism with  $^{13}\text{C}$ -formate. While it has been  
8 proposed that anammox bacteria fully oxidize organic substrates, such as formate, to  $\text{CO}_2^4$ , we  
9 hypothesized that formate could be assimilated by *K. stuttgartiensis* via the methyl branch of the  
10 Wood-Ljungdahl pathway. This would result in a positionally labelled acetyl-CoA pool that would  
11 provide additional information on metabolic network activity (Figure 2a).

12 We tested this hypothesis by rapidly introducing  $^{13}\text{C}$ -formate into fresh continuous cultures  
13 of *K. stuttgartiensis* to a concentration of 50 mM followed by metabolome sampling over 180  
14 minutes (14 timepoints total). Within 1.5 minutes of  $^{13}\text{C}$ -formate introduction, we observed steady-  
15 state labelling of several central metabolites, including phosphoenolpyruvate (Figure 2b) and 3-  
16 phosphoglycerate (Figure 3b), consistent with direct assimilation of formate. In agreement with  
17 formate assimilation via the Wood-Ljungdahl pathway, only the M+1 mass isotopomer of acetyl-  
18 CoA became enriched during the experiment (Figure 2c). M+1 mass isotopomers of  
19 phosphoenolpyruvate and aspartic acid (oxaloacetate surrogate) were also dominant (Figure 2c),  
20 consistent with their synthesis from acetyl-CoA via the sequential reactions of PFOR,  
21 phosphoenolpyruvate synthase, and phosphoenolpyruvate (or pyruvate) carboxylase, respectively.  
22 Since only a very minor fraction of the M+2 mass isotopomer were detected in these metabolites  
23 (<3% over initial 45 minutes), it can be concluded that intracellular  $^{13}\text{C}$ - $\text{CO}_2$  concentrations  
24 remained low during the experiment. Consistent with this, measured  $^{13}\text{C}$ -DIC content in the liquid  
25 media produced from  $^{13}\text{C}$ -formate oxidation was low, increasing to only 5% over 45 minutes  
26 (Figure 2b). This supports the inference that  $^{13}\text{C}$ -inorganic carbon incorporation into metabolites  
27 was insignificant compared to the rate of incorporation via  $^{13}\text{C}$ -formate. Similar to  $^{13}\text{C}$ -bicarbonate  
28 experiments, slower labelling of acetyl-CoA and pyruvate was observed during the  $^{13}\text{C}$ -formate  
29 tracer experiments (Figure 2b; Figure 2c). This further supports the hypothesis that separate  
30 intracellular pools of these metabolites may exist in *K. stuttgartiensis*.

1  $^{13}\text{C}$ -formate labelling experiments also allowed us to analyze operation of the TCA cycle.  
2 If the reductive TCA cycle was operating in *K. stuttgartiensis* only a single carbon in alpha-  
3 ketoglutarate would be labelled (from oxaloacetate), while two carbons would be labelled if alpha-  
4 ketoglutarate was produced oxidatively (from oxaloacetate and acetyl-CoA). Consistent with the  
5 latter route, mass isotopomer distributions for citrate and alpha-ketoglutarate consisted largely of  
6 M+2 mass isotopomers (Figure 2c). This clearly demonstrates that alpha-ketoglutarate was  
7 produced via an oxidative TCA cycle in *K. stuttgartiensis*, and not via the reductive TCA cycle.  
8 On the contrary, malate, fumarate, and succinate pools were largely comprised of M+1 mass  
9 isotopomers (Figure 2c), which suggests that a bifurcated TCA cycle was operating.

10 The labelling patterns of TCA cycle metabolites suggest that *K. stuttgartiensis* uses a novel  
11 or highly divergent enzyme for citrate synthesis. While no citrate synthase is annotated in the *K.*  
12 *stuttgartiensis* genome, several acyltransferase candidates exist, including genes annotated as (R)-  
13 citramalate synthase (KSMBR1\_RS19040) believed to be involved in isoleucine biosynthesis<sup>25</sup>  
14 and redundant copies of 2-isopropylmalate synthase (KSMBR1\_RS18315 and  
15 KSMBR1\_RS10820). In particular, one of the 2-isopropylmalate synthase genes  
16 (KSMBR1\_RS10820) is phylogenetically related (55.1% identity) to *Re*-citrate synthase identified  
17 in *Clostridium kluyveri*<sup>26</sup> and is located next to an ADP-forming succinate-CoA ligase of the  
18 oxidative TCA cycle. Therefore, we posit that this gene encodes a dedicated *Re*-citrate synthase  
19 that allows the oxidative TCA cycle to be operational in *K. stuttgartiensis*.

20  
21 **Multiple pathways for sugar phosphate biosynthesis?** Results from the  $^{13}\text{C}$ -formate tracer  
22 experiments also allowed for closer examination of pentose and hexose sugar phosphate  
23 biosynthesis in *K. stuttgartiensis*. Because the labelled pools of 3-phosphoglycerate and  
24 dihydroxyacetone phosphate were largely comprised of M+1 mass isotopomers, we expected  
25 fructose 6-phosphate to largely consist of M+2 mass isotopomers based on gluconeogenesis  
26 reactions (Figure 3a). However, a considerable fraction of fructose 6-phosphate (Figure 3b) and  
27 glucose 6-phosphate (Supplementary Dataset 1) were consistently present as M+1 mass  
28 isotopomers during the  $^{13}\text{C}$ -formate tracer experiment (~25-45%). While it is possible that this  
29 labeling pattern was produced during the period when the M+1 isotopomers of dihydroxyacetone  
30 phosphate and glyceraldehyde 3-phosphate were ~50% (<1.5 minutes), it more likely suggests that  
31 alternative pathways exist for sugar phosphate biosynthesis in *K. stuttgartiensis*.

1  
2 **Amino acid biosynthetic pathways.**  $^{13}\text{C}$ -formate tracer results were also used to confirm major  
3 amino acid biosynthetic pathways in *K. stuttgartiensis*. Our data supports the synthesis of  
4 aspartate, asparagine, and threonine via canonical routes from oxaloacetate; the synthesis of  
5 glutamate glutamine, proline, and arginine from alpha-ketoglutarate; and the synthesis of serine  
6 from 3-phosphoglycerate (Supplementary Figure 1). Labelling patterns for valine, alanine, and  
7 leucine support their production via canonical branched chain amino acid biosynthesis pathways  
8 from pyruvate (Supplementary Figure 1). Interestingly, isoleucine biosynthesis was not supported  
9 by canonical routes from threonine, but rather via a recently described citramalate-dependent  
10 pathway from acetyl-CoA and pyruvate<sup>27,28</sup> (Supplementary Figure 1). Finally, labeling patterns  
11 supported the synthesis of the aromatic amino acids, phenylalanine and tyrosine from erythrose 4-  
12 phosphate and phosphoenolpyruvate via the shikimate pathway (Supplementary Figure 1). These  
13 amino acid biosynthetic pathways were consistent with pathways predicted from the *K.*  
14 *stuttgartiensis* genome annotation.

15         Despite the *K. stuttgartiensis* genome lacking an annotated pathway for methionine  
16 biosynthesis, methionine was labelled during both  $^{13}\text{C}$ -formate and  $^{13}\text{C}$ -bicarbonate experiments.  
17 Canonical precursors for methionine biosynthesis include aspartic acid and methyl-THF (from  
18 formate via methyl-branch of Wood Ljungdahl pathway), thus if this pathway were operating, we  
19 would expect to see mainly M+2 methionine. However, a considerable pool of M+1 methionine  
20 was consistently observed in our experiments (Supplementary Figure 1), suggesting that a  
21 potentially novel pathway is operating to synthesize methionine in *K. stuttgartiensis* that remains  
22 to be elucidated.

23  
24 **Acetate oxidation pathway of anammox bacteria.** In addition to formate, we also examined the  
25 impact of acetate on *K. stuttgartiensis*' metabolic network. While it has been proposed that  
26 anammox bacteria can oxidize acetate to  $\text{CO}_2$ <sup>8,29</sup>, the pathways used for acetate oxidation and  
27 whether or not acetate is assimilated into biomass have yet to be resolved. If acetate were oxidized  
28 to  $\text{CO}_2$ , we expected that it would initially be incorporated into acetyl-CoA based on previous  
29 enzymatic studies with AMP-forming acetyl-CoA synthetase (KSMBR1\_RS14485)<sup>30</sup>, followed  
30 by oxidation to  $\text{CO}_2$  via either the oxidative TCA cycle or reversal of the Wood-Ljungdahl

1 pathway, as previously suggested for other anaerobic chemolithoautotrophic bacteria<sup>31,32</sup> (Figure  
2 4a).

3 To elucidate metabolic pathways involved in acetate metabolism, we rapidly introduced  
4 [2-<sup>13</sup>C]acetate into active continuous cultures of *K. stuttgartiensis* to a final concentration of 10  
5 mM and sampled the metabolome over 180 minutes (12 timepoints). Within 1.5 minutes after [2-  
6 <sup>13</sup>C]acetate addition, we observed steady-state enrichment of the M+1 mass isotopomer of acetyl-  
7 CoA, indicating its synthesis via CoA acetylation (Figure 4c). Considerable <sup>13</sup>C-labelling of citrate  
8 and glutamate was also observed, suggesting partial oxidative TCA cycle activity (Figure 4c).  
9 However, the mass isotopomer distributions for citrate and glutamate contained heavier mass  
10 isotopomers (up to M+4) and appeared more evenly distributed, an observation more consistent  
11 with the labeling patterns observed during <sup>13</sup>C-bicarbonate tracing (Figure 1c) versus <sup>13</sup>C-formate  
12 tracing (Figure 2c). This pattern can be explained by additional acetate oxidation via the reverse  
13 Wood-Ljungdahl pathway to <sup>13</sup>C-CO<sub>2</sub>, followed by reincorporation of <sup>13</sup>C-CO<sub>2</sub> into central  
14 metabolites. In agreement with this, mass isotopomer distributions for all other measured  
15 metabolites, including phosphoenolpyruvate, 3-phosphoglycerate, dihydroxyacetone phosphate,  
16 and fructose 6-phosphate, had relatively even distributions of <sup>13</sup>C-labelled mass isotopomers,  
17 suggesting they were also synthesized from re-incorporated <sup>13</sup>C-CO<sub>2</sub> (Figure 4c). Since <sup>13</sup>C-  
18 enrichment for most of these metabolites were approximately 2-10 times higher than that of <sup>13</sup>C-  
19 CO<sub>2</sub> in the media (Figure 4b), we conclude that <sup>13</sup>C-CO<sub>2</sub> re-incorporation was faster than the efflux  
20 of <sup>13</sup>C-CO<sub>2</sub>.

21 Surprisingly, metabolites that labelled rapidly during <sup>13</sup>C-bicarbonate and <sup>13</sup>C-formate  
22 experiments, including phosphoenolpyruvate and 3-phosphoglycerate, labelled slowly with <sup>13</sup>C-  
23 acetate (Figure 4c). This could be additional evidence that spatial separation of carbon metabolism  
24 occurs in *K. stuttgartiensis*, contributing to different pools of acetyl-CoA and pyruvate. Separation  
25 of the AMP-forming acetyl-CoA synthetase and potentially other central metabolism enzymes to  
26 the outer membrane and periplasm has been reported in the chemolithoautotrophic archaeon  
27 *Ignicoccus hospitalis*<sup>33</sup>. Interestingly, this enzymes shares homology with the AMP-forming  
28 acetyl-CoA synthetase found in *K. stuttgartiensis*<sup>30</sup> and both organisms have ATPases localized to  
29 their outer membranes (van Niftrik, 2010, PNAS, 2010). While this raises the possibility that  
30 similar spatial separation of metabolism may be present in *K. stuttgartiensis*, further experimental  
31 validation is required.



1  
2 **<sup>13</sup>C protein stable isotope probing confirms substrate uptake by *K. stuttgartiensis*.** To confirm  
3 uptake of labelled substrates into the biomass of *K. stuttgartiensis* cells, we performed shotgun  
4 proteomics on peptides extracted from bioreactor cell pellets collected during <sup>13</sup>C-labelling  
5 experiments. Metaproteomic analysis of samples collected after 0 and 72 hours confirmed that <sup>13</sup>C-  
6 bicarbonate was incorporated into the *K. stuttgartiensis* proteome, increasing at a median relative  
7 isotope abundance of ~50%, consistent with the <sup>13</sup>C-DIC content of the liquid media  
8 (Supplementary Figure 2). Incorporation of <sup>13</sup>C-formate and [2-<sup>13</sup>C]acetate into the *K.*  
9 *stuttgartiensis* proteome was also detected after 72 hours at median relative isotope abundances of  
10 ~30% and ~10%, respectively (Supplementary Figure 2). These values are consistent with the use  
11 of the Wood-Ljungdahl pathway for formate assimilation, and with re-assimilation of <sup>13</sup>C-CO<sub>2</sub>  
12 produced from acetate oxidation, as the <sup>13</sup>C-DIC in the liquid media held at ~11% between 5 and  
13 72 hours (Figure 4b).

14  
15 **Isotopically non-stationary metabolic flux analysis of autotrophic growth.** To quantitatively  
16 examine *K. stuttgartiensis*' central carbon metabolism and obtain intracellular flux measurements,  
17 we performed INST-MFA by fitting measured, time-resolved metabolite mass isotopomer  
18 distributions from <sup>13</sup>C-formate tracer experiments to an isotopomer network model<sup>34</sup>. This  
19 provided a quantitative systems-level flux map of *K. stuttgartiensis*' inferred central carbon  
20 metabolism (Figure 5). Flux values were normalized to a net CO<sub>2</sub> uptake rate, which was estimated  
21 from the growth rate and cell carbon content: 0.0042 hrs<sup>-1</sup> x 45 mmol-C/gDW = 0.186 mmol-  
22 C/gDW/hr. The resulting flux map reproduces the high intracellular flux anticipated through the  
23 Wood-Ljungdahl pathway, PFOR, and phosphoenolpyruvate (or pyruvate) carboxylase, which are  
24 the main CO<sub>2</sub> fixation reactions that we observed in *K. stuttgartiensis* (Figure 5). INST-MFA also  
25 supported alpha-ketoglutarate production via the oxidative TCA cycle. Moreover, instead of  
26 running a bifurcated TCA cycle, the INST-MFA analysis predicts that the M+1 isotopomers of  
27 fumarate, succinate, and malate were indirectly derived from aspartic acid as a result of histidine  
28 and arginine biosynthesis (Figure 5). This suggests that the TCA cycle in *K. stuttgartiensis*  
29 operates incompletely, essentially functioning to produce alpha-ketoglutarate (amino acid  
30 precursor) and recycle intermediates of amino acid biosynthesis. Considerable oxidative pentose

1 phosphate pathway flux was also measured (Figure 5). As no transhydrogenase could be identified  
2 in the genome, it is likely that this pathway is key for NADPH generation in *K. stuttgartiensis*.

3 INST-MFA also allowed us to query alternative reactions for the unexpected labelling  
4 patterns of sugar phosphates during  $^{13}\text{C}$ -formate tracer experiments. The genome annotation of *K.*  
5 *stuttgartiensis* has genes coding for hexulose 6-phosphate synthase and 6-phospho-3-  
6 hexuloisomerase (KSMBR1\_RS05220 and KSMBR1\_RS18790, respectively). These are key  
7 enzymes of the ribulose monophosphate (RuMP) pathway, a formaldehyde assimilation pathway  
8 in many methylophilic bacteria<sup>35</sup>. Together, these reactions fix formaldehyde to fructose 6-  
9 phosphate via a hexulose 6-phosphate intermediate<sup>35</sup>. We hypothesize that these reactions, as well  
10 as an unidentified formaldehyde dehydrogenase, could explain the considerable M+1 pentose and  
11 hexose phosphate isotopomers observed during  $^{13}\text{C}$ -formate labelling (Supplementary Figure 3).  
12 Including these reactions in our INST-MFA improved the models fit by approximately 19% (SSR  
13 of 802.1 versus 988.7, 95% confidence interval), accounting for approximately 23% of the flux  
14 synthesizing fructose 6-phosphate (Figure 5).

15

## 16 Discussion

17 Elucidating the *in vivo* metabolic network of *K. stuttgartiensis* represents a major advance towards  
18 predicting the function of anammox bacteria in natural and engineered ecosystems. Our study  
19 offers the first measurements of metabolic flux via INST-MFA in a chemolithoautotrophic  
20 organism, providing a systems-level flux map for *K. stuttgartiensis* that can be used to understand  
21 anammox bacterial central carbon metabolism. The discovery of an incomplete oxidative TCA  
22 cycle operating in *K. stuttgartiensis*, likely mediated by a novel *Re*-citrate synthase, avoids the  
23 energetically costly use of reduced ferredoxin for alpha-ketoglutarate biosynthesis via the  
24 reductive TCA cycle. Furthermore, the considerable flux measured through the oxidative pentose  
25 phosphate pathway highlights an important link between carbon and energy metabolism for  
26 generating reducing equivalents (i.e. NADPH) in anammox bacteria. Our analysis validated the  
27 use of the Wood-Ljungdahl pathway, PFOR, and phosphoenolpyruvate/pyruvate carboxylase for  
28  $\text{CO}_2$  fixation in *K. stuttgartiensis* and provided first evidence of possible compartmentalization  
29 and/or metabolic channeling in these pathways. This may enable faster pathway kinetics, avoid  
30 degradation of unstable tetrahydrofolate-based intermediates, or limit competition between  
31 competing reactions, as has been shown with other pathways<sup>36,37</sup>.

1 We also elucidated the role of the Wood-Ljungdahl pathway for formate assimilation by  
2 *K. stuttgartiensis* and show that reversal of this pathway can additionally be used for acetate  
3 oxidation. This may further support the metabolism of *K. stuttgartiensis* in their anaerobic habitats,  
4 where these compounds likely exist as fermentation products<sup>38,39</sup>. Together, these findings provide  
5 insight into the mechanisms underlying the observed versatility of anammox bacteria<sup>40</sup> and may  
6 inform strategies to control anammox-based bioprocesses via organic substrate addition<sup>41</sup>.

7 Our elucidation of *K. stuttgartiensis*' *in vivo* metabolic network fluxes will spur further  
8 quantitative studies on anammox metabolism and enable the construction of accurate genome-  
9 scale metabolic models to predict anammox bacterial physiology. We believe that when integrated  
10 with metabolic models of other nitrogen cycling bacteria<sup>42</sup>, drastic improvements in the prediction  
11 and control of anammox-based biotechnologies and biogeochemical processes will be possible.

## 12 **Materials and Methods**

### 13 ***Cultivation of K. stuttgartiensis cells***

14 A high enrichment of planktonic *K. stuttgartiensis* cells were cultivated in a continuous flow  
15 membrane bioreactor (MBR) on mineral salts medium<sup>43</sup> supplemented with 45 mM of both  
16 ammonium and nitrite. Cultures were maintained under steady-state conditions at an OD<sub>600</sub> of 1.0-  
17 1.1 via continuous biomass removal and the bioreactor was continuously sparged with Ar/CO<sub>2</sub>  
18 (95%/5% v/v) at a rate of 10 ml/min to maintain anaerobic conditions. The reactor hydraulic and  
19 solids retention times were approximately 46 hours and 10.5 days, respectively. The temperature  
20 and pH of the reactor were controlled at 30°C and 7.3 using a heat exchanger and 1 M KHCO<sub>3</sub>  
21 buffer, respectively. The reactor was continuously stirred at 600 rpm. Nitrite concentrations were  
22 checked daily to ensure nitrite-limited conditions (Nitrite test strips MQuant®, Merck, Darmstadt,  
23 Germany).

### 24 ***<sup>13</sup>C isotope tracer experiments***

25  
26 Isotope tracing experiments with <sup>13</sup>C-labelled substrates ([<sup>13</sup>C]sodium bicarbonate, [2-<sup>13</sup>C]sodium  
27 acetate, and [<sup>13</sup>C]sodium formate; Cambridge Isotopes Laboratories, MA, USA) were performed  
28 separately on continuous cultures of *K. stuttgartiensis* cells harvested from the MBR system. <sup>13</sup>C-  
29 labelled substrates were rapidly introduced (within 1 minute) into the bioreactor containing *K.*  
30 *stuttgartiensis* cells growing under steady-state conditions. Initial reactor concentrations of

1 bicarbonate, acetate and formate were approximately 30 mM, 5 mM and 50 mM respectively.  
2 Following  $^{13}\text{C}$ -label introduction, 5 ml samples were rapidly withdrawn from the reactor at  
3 timepoints 0, 1.5, 3, 5, 8, 11, 15, 20, 30, 45, 60, 90, 120, and 180 minutes. Samples were  
4 immediately filtered (Millipore 0.45  $\mu\text{m}$  hydrophilic nylon filter HNWPO4700) using a vacuum  
5 pump to remove the medium, and filters were placed face down in 1.5 ml of  $-80^\circ\text{C}$  extraction  
6 solvent (40:40:20 acetonitrile:methanol:water) for cell quenching and metabolite extraction.  
7 Samples were then centrifuged (10,000 rpm,  $4^\circ\text{C}$ , 5 mins) and 1 ml of cell-free supernatant was  
8 collected and stored at  $-80^\circ\text{C}$  for metabolomic analysis. The time 0 min sample corresponded to  
9 the period directly before  $^{13}\text{C}$ -label addition. The ratio of  $^{13}\text{C}/^{12}\text{C}$  DIC remained constant during  
10 the course of the experiment as determined by gas chromatography coupled with mass  
11 spectrometry (GC-MS) analysis (See method below).

12

### 13 *Metabolomic analysis*

14 Samples were analysed using a high-performance HPLC–MS system consisting of a Vanquish<sup>TM</sup>  
15 UHPLC system (Thermo Scientific) coupled by electrospray ionization (ESI; negative polarity) to  
16 a hybrid quadrupole high-resolution mass spectrometer (Q Exactive Orbitrap, Thermo Scientific)  
17 operated in full scan mode for detection of targeted compounds based on their accurate masses.  
18 Properties of Full MS–SIM included a resolution of 140,000, AGC target of  $1\text{E}6$ , maximum IT of  
19 40 ms and scan range from 70 to 1,000 m/z. LC separation was achieved using an ACQUITY  
20 UPLC BEH C18 column ( $2.1 \times 100$  mm column, 1.7  $\mu\text{m}$  particle size; part no. 186002352; serial  
21 no. 02623521115711, Waters). Solvent A was 97:3 water:methanol with 10 mM tributylamine  
22 (TBA) adjusted to pH 8.1–8.2 with 9 mM acetic acid. Solvent B was 100% methanol. Total run  
23 time was 25 min with the following gradient: 0 min, 5% B; 2.5 min, 5% B; 5 min, 20% B; 7.5 min,  
24 20% B; 13 min, 55% B; 15.5 min, 95% B; 18.5 min, 95% B; 19 min, 5% B; 25 min, 5% B. Flow  
25 rate was  $200 \mu\text{l min}^{-1}$ . The autosampler and column temperatures were  $4^\circ\text{C}$  and  $25^\circ\text{C}$ , respectively.  
26 Mass isotopomer distributions were corrected for natural abundance using the method of Su et al  
27 (2017)<sup>44</sup> and  $^{13}\text{C}$  enrichment values were calculated using the formula  $(1/N) \sum_{i=1}^N M_i \times i$ , where  
28  $N$  is the number of carbon atoms in the metabolite and  $M_i$  is the fractional abundance of the  $i^{\text{th}}$   
29 mass isotopomer.

30 To improve separation and measurement sensitivity of specific central carbon metabolites  
31 and intracellular amino acids, samples were first derivatized with either aniline<sup>45,46</sup> or benzyl

1 chloroformate<sup>47</sup>, respectively. For aniline derivatization, samples were resuspended in 50  $\mu$ l  
2 HPLC-grade water, 5  $\mu$ l aniline (6M, pH 4.5), and 5  $\mu$ l N-(3-dimethylaminopropyl)-N'-  
3 ethylcarbodiimide hydrochloride, EDC, (200 mg/ml). After 2 hours of incubation at room  
4 temperature, 1  $\mu$ l of triethylamine was added to stop the reaction. For benzyl chloroformate  
5 derivatization, samples were resuspended in 10  $\mu$ l HPLC-grade water, 40  $\mu$ l methanol, 5  $\mu$ l of  
6 triethylamine, and 1  $\mu$ l benzyl chloroformate and incubated at room temperature for 30 minutes.

7

### 8 ***GC-MS analysis of dissolved inorganic carbon isotopic fractions***

9 Isotopic fractions of DIC in the liquid media were measured based on a modified headspace  
10 method<sup>48</sup>. 3 ml of liquid culture were collected from the bioreactor with a syringe and directly  
11 filtered through a sterile 0.45  $\mu$ m filter (Whatmann, celluloseacetate) and 26G needle into a 120 ml  
12 bottle containing 1 ml 6M HCl and crimp sealed with a rubber stopper. Prior to adding the liquid  
13 sample, bottles and HCl were flushed with either 100% N<sub>2</sub> or Ar gas to void the headspace of  
14 background CO<sub>2</sub>. Samples were equilibrated with the acid in the bottles for at least 1 hour at room  
15 temperature to drive all DIC into the gas phase. 50  $\mu$ l of the bottles headspace was then injected  
16 with a gas tight syringe (Hamilton) into a gas chromatograph (Agilent 6890 equipped with 6 ft  
17 Porapak Q columns) at 80°C with helium as a carrier gas at a flow rate of 24 ml/min, coupled to a  
18 mass spectrometer (Agilent 5975C MSD; Agilent, Santa Clara, CA) to determine the isotopic  
19 fractions of <sup>12</sup>CO<sub>2</sub> and <sup>13</sup>CO<sub>2</sub>.

20

### 21 ***Isotopic non-stationary metabolic flux analysis***

22 Intracellular metabolic fluxes were estimated from the measured metabolite isotope labelling  
23 dynamics via INST-MFA using the elementary metabolite unit method<sup>34</sup> implemented in the INCA  
24 software package v1.8<sup>49</sup>. Metabolic fluxes and pool sizes were estimated by minimizing the lack-  
25 of-fit between measured and computationally simulated metabolite mass isotopomer distributions  
26 using least-squares regression. All metabolite mass isotopomer distribution measurements and  
27 model reactions used for flux determination are provided in Supplementary Datasets 1 and 2,  
28 respectively. The biomass equation was based on experimental measurements of the amino acid  
29 composition obtained from *K. stuttgartiensis* biomass pellets (Supplementary Table 1).  
30 Pseudofluxes were added to the model for specific metabolites to account for inactive metabolite  
31 pools that did not participate in metabolism, but contributed to measured metabolite labelling

1 patterns, similar to Ma et al. (2014)<sup>50</sup>. Chi-squared statistical tests were performed on resulting  
2 flux distributions to assess goodness-of-fit, and accurate 95% confidence intervals were computed  
3 for all estimated parameters by evaluating the sensitivity of the sum-of-squared residuals to  
4 parameter variations<sup>51</sup>.

### 6 *Amino acid composition analysis*

7 Cultures were centrifuged (10,000 rpm, 15 mins, 4°C) to obtain cell pellets, which were  
8 subsequently freeze-dried prior to analysis. Total protein concentration was determined using the  
9 Pierce™ BCA Protein Assay Kit (ThermoFisher Scientific) and amino acid composition was  
10 determined according to Carnicer et al. (2009)<sup>52</sup> using a Varian 920-LC high performance liquid  
11 chromatography amino acid analyzer.

### 13 *<sup>13</sup>C protein stable isotope probing*

14 Proteins were extracted from bioreactor cell pellets using glass bead beating (acid, washed, 0.1  
15 mm diameter) in a suspension containing B-PER reagent (Thermo Scientific, Germany) and TEAB  
16 buffer (50 mM TEAB, 1% (w/w) NaDOC at pH 8). Following DTT reduction and alkylation using  
17 iodo acetamide (IAA) protein extracts were subject to proteolytic digestion using trypsin.  
18 Resulting peptides were solid phase extraction purified using an Oasis HLB 96 well plate (Waters,  
19 UK), according to the manufacturer protocols. The purified peptide fraction was analysed via an  
20 one-dimensional reverse phase separation (Acclaim PepMap RSLC RP C18, 50 µm x 150 mm,  
21 2µm, 100A) coupled to a Q-Exactive plus Orbitrap mass spectrometer (Thermo Scientific,  
22 Germany) operating in data dependent acquisition mode (DDA, shot-gun proteomics). The flow rate  
23 was maintained at 300 nL/min over a linear gradient from 5% to 30% over 90 minutes and finally  
24 to 75% B over 25 minutes. Solvent A was H<sub>2</sub>O containing 0.1% formic acid, and solvent B  
25 consisted of 80% acetonitrile in H<sub>2</sub>O and 0.1% formic acid. The Orbitrap was operated in DDA  
26 mode acquiring peptide signals from 350-1400 m/z, where the top 10 signals (with a charge  
27 between 2-7) were isolated at a window of 2.0 m/z and fragmented using a NCE of 30. The AGC  
28 target was set to 1e5, at a max IT of 54 ms and 17.5 K resolution. Protein identification and relative  
29 isotope abundances were determined from Tandem-MS data using PEAKS Studio X (BSI,  
30 Canada) and MetaProSIP (OpenMS, Univ Tuebingen/Berlin, Germany)<sup>53</sup> integrated into the  
31 KNIME 4.0.1 analysis platform (Zurich, Switzerland), respectively. All peptide spectra were

1 matched against a protein database generated from predicted open reading frames from the *K.*  
2 *stuttgartiensis* genome.

#### 4 **Acknowledgements**

5 The authors would like to acknowledge Patricia van Dam and Carol de Ram for help with  
6 metaproteomic sample preparation, Kathinka van de Pas-Schoonen for help with bioreactor  
7 maintenance, Paul van der Ven and Sebastian Kroose for help with amino acid analysis, and Arjan  
8 Pol and Huub Op den Camp for helpful discussions. Funding was provided by the National  
9 Science Foundation (CBET-1435661, CBET-1803055 and MCB-1518130), the Netherlands  
10 Organization for Scientific Research (Grants 016.Vidi.189.050 and SIAM Gravitation Grant  
11 024.002.002), the European Research Council (ERC Advanced Grant Ecomom 339880), a  
12 Wisconsin Distinguished Graduate Fellowship, a Postgraduate Scholarship-Doctoral (PGS-D) by  
13 the National Sciences and Engineering Research Council of Canada (NSERC), and the UW-  
14 Madison Office of the Vice Chancellor for Research and Graduate Education through the  
15 Microbiome Initiative.

#### 17 **Figure Legends**

18 **Figure 1.**  $^{13}\text{C}$ -enrichment of selected metabolites during  $^{13}\text{C}$ -bicarbonate dynamic tracing  
19 experiments. (A) Mass isotopomer distributions (MID) for selected metabolites illustrating  
20 potential substrate channeling through the Wood-Ljungdahl Pathway and PFOR. (B)  $^{13}\text{C}$   
21 enrichment of metabolites associated with (left) initial  $\text{CO}_2$  fixation reactions (Wood-Ljungdahl  
22 Pathway, pyruvate:ferredoxin oxidoreductase) and metabolites downstream of pyruvate; (center)  
23 TCA cycle metabolites; (right) gluconeogenesis and pentose phosphate pathway metabolites. (C)  
24 Selected mass isotopomer distributions for metabolites of the TCA cycle, gluconeogenesis, and  
25 the pentose phosphate pathway. All measured metabolite MIDs and standard errors can be found  
26 in Supplementary Dataset 1.

28 **Figure 2.** Elucidating TCA cycle of *K. stuttgartiensis* with  $^{13}\text{C}$ -formate. (A) Proposed labelling of  
29 TCA cycle metabolites with  $^{13}\text{C}$ -formate. (B)  $^{13}\text{C}$ -enrichment of selected metabolites during  
30 isotope tracer experiments with  $^{13}\text{C}$ -formate. (C) Time-series mass isotopomer distributions of

1 selected TCA cycle metabolites during isotope tracer experiments with  $^{13}\text{C}$ -formate. All measured  
2 metabolite MIDs and standard errors can be found in Supplementary Dataset 1.

3  
4 **Figure 3.** Operation of gluconeogenesis and pentose phosphate pathway in *K. stuttgartiensis*  
5 revealed by  $^{13}\text{C}$ -formate dynamic labelling experiments. (A) proposed atom mapping of  
6 gluconeogenesis and pentose phosphate pathway from  $^{13}\text{C}$ -formate labelled phosphoenolpyruvate  
7 at steady-state. (B) Time-series mass isotopomer distributions of selected gluconeogenesis and  
8 pentose phosphate pathway metabolites during dynamic isotope tracer experiments with  $^{13}\text{C}$ -  
9 formate. All measured metabolite MIDs and standard errors can be found in Supplementary  
10 Dataset 1.

11  
12 **Figure 4.** Reverse Wood-Ljungdahl pathway oxidizes acetate in *K. stuttgartiensis*. (A) Proposed  
13 labelling of TCA cycle metabolites with  $[2-^{13}\text{C}]$ acetate. (B)  $^{13}\text{C}$ -enrichment of selected metabolites  
14 during isotope tracer experiments with  $[2-^{13}\text{C}]$ acetate (red). (C) Time-series mass isotopomer  
15 distributions of selected TCA cycle metabolites during isotope tracer experiments with  $^{13}\text{C}$ -acetate.  
16 All measured metabolite MIDs and standard errors can be found in Supplementary Dataset 1.

17  
18  
19 **Figure 5.** *K. stuttgartiensis* flux map generated by  $^{13}\text{C}$  INST-MFA. *K. stuttgartiensis* flux map  
20 under anaerobic, continuous flow, ammonium and nitrite medium conditions determined by fitting  
21 metabolites labelled with  $^{13}\text{C}$ -formate tracers to a single, statistically acceptable isotopomer  
22 network model. Flux values represent the net flux through a given reaction +/- standard error  
23 defined at 95% confidence. All fluxes are normalized to a net  $\text{CO}_2$  uptake rate of  $q=100$  mmol-  
24 C/gDW/hr (actual  $\text{CO}_2$  uptake rate was 0.186 mmol-C/gDW/hr). All isotopomer network model  
25 reactions are provided in Supplementary Dataset 2. INST-MFA solutions are provided in  
26 Supplementary Dataset 3.

27  
28 **Supplementary Figure 1.** Confirmation of amino acid biosynthetic pathways in *K. stuttgartiensis*.  
29 (Right) Expected metabolite labeling patterns from  $^{13}\text{C}$ -formate. (Left) Mass isotopomer  
30 distributions for measured intracellular amino acids.

31



1 **Supplementary Figure 2.** Confirmation of  $^{13}\text{C}$ -labelled substrate incorporation into the proteome  
2 of *K. stuttgartiensis*. Distribution of relative isotope abundances for identified peptides assigned  
3 to the *K. stuttgartiensis* proteome during  $[2-^{13}\text{C}]$ acetate,  $^{13}\text{C}$ -formate, and  $^{13}\text{C}$ -bicarbonate tracer  
4 experiments after 0 and 72 hours.

5  
6 **Supplementary Figure 3.** Proposed synthesis of sugar phosphates from gluconeogenesis and the  
7 RuMP cycle in *K. stuttgartiensis*. RuMP cycle reactions that synthesize fructose 6-phosphate (F6P)  
8 from formaldehyde ( $\text{CH}_2\text{O}$ ) and ribulose 5-phosphate (Ru5P) are shown in orange. Production of  
9  $\text{CH}_2\text{O}$  from formate via an unknown formaldehyde dehydrogenase is also shown in orange.  
10 Reducing equivalents shown in pink; ATP shown in green;  $\text{CO}_2$  shown in blue. *fdh*: formaldehyde  
11 dehydrogenase; *hps*: hexulose 6-phosphate synthase; *hpi*: hexulose 6-phosphate isomerase; ?  
12 indicates no gene annotation present.

13  
14 **Supplementary Table 1.** *K. stuttgartiensis* biomass amino acid composition.

15  
16 **Supplementary Dataset 1.** Average metabolite mass isotopomer distributions and associated  
17 standard errors during  $^{13}\text{C}$ -bicarbonate,  $^{13}\text{C}$ -formate, and  $[2-^{13}\text{C}]$ acetate tracer experiments. (Sheet  
18 1A) Average mass isotopomer distributions for selected metabolites during  $^{13}\text{C}$ -bicarbonate  
19 tracing, (Sheet 1B) Mass isotopomer distributions standard error values for selected metabolites  
20 during  $^{13}\text{C}$ -bicarbonate tracing, (Sheet 2A) Average mass isotopomer distributions for selected  
21 metabolites during  $^{13}\text{C}$ -formate tracing, (Sheet 2B) Mass isotopomer distributions standard error  
22 values for selected metabolites during  $^{13}\text{C}$ -formate tracing, (Sheet 3A) Average mass isotopomer  
23 distributions for selected metabolites during  $[2-^{13}\text{C}]$ acetate tracing, (Sheet 3B) Mass isotopomer  
24 distributions standard error values for selected metabolites during  $[2-^{13}\text{C}]$ acetate tracing.

25  
26 **Supplementary Dataset 2.** *K. stuttgartiensis* isotopomer network model. Letters within brackets  
27 indicate carbon atom transitions of each metabolite for a given reaction.

28  
29 **Supplementary Dataset 3.** INST-MFA model results. Metabolite MIDs used for model fitting  
30 were Pro, Asn, Ala, Thr, aKG, Ser, Suc, Asp, Glu, R5P, PEP, Cit, Mal, Ru5P, Fum, F6P, Pyr, G6P,

1 Val, CO<sub>2</sub>, and Gln at timepoints 0, 1.5, 3, 5, 8, 11, 15, 20, 30, and 45 minutes. All metabolite  
2 MIDs can be found in Supplementary Dataset 1.

3

#### 4 **Reference**

- 5 1. Strous, M. *et al.* Missing lithotroph identified as new planctomycete. *Nature* **400**, 446–449  
6 (1999).
- 7 2. Strous, M. *et al.* Deciphering the evolution and metabolism of an anammox bacterium  
8 from a community genome. *Nature* **440**, 790–4 (2006).
- 9 3. Kartal, B. *et al.* Molecular mechanism of anaerobic ammonium oxidation. *Nature* **479**,  
10 127–30 (2011).
- 11 4. Kartal, B. *et al.* How to make a living from anaerobic ammonium oxidation. *FEMS*  
12 *Microbiol. Rev.* **37**, 428–461 (2013).
- 13 5. Jetten, M. S. M., Horn, S. J. & van Loosdrecht, M. C. M. Towards a more sustainable  
14 municipal wastewater treatment system. *Water Sci. Technol.* **35**, 171–180 (1997).
- 15 6. Kartal, B., Kuenen, J. G. & van Loosdrecht, M. C. M. Sewage Treatment with Anammox.  
16 *Science (80-. )*. **328**, 702–703 (2010).
- 17 7. Lackner, S. *et al.* Full-scale partial nitrification/anammox experiences – An application  
18 survey. *Water Res.* **55**, 292–303 (2014).
- 19 8. Kartal, B. *et al.* Anammox bacteria disguised as denitrifiers: nitrate reduction to dinitrogen  
20 gas via nitrite and ammonium. *Environ. Microbiol.* **9**, 635–42 (2007).
- 21 9. Oshiki, M., Ali, M., Shinyako-Hata, K., Satoh, H. & Okabe, S. Hydroxylamine-dependent  
22 Anaerobic Ammonium Oxidation (Anammox) by “*Candidatus Brocadia sinica*”. *Environ.*  
23 *Microbiol.* (2016). doi:10.1111/1462-2920.13355
- 24 10. Hu, Z., Wessels, H. J. C. T., van Alen, T., Jetten, M. S. M. & Kartal, B. Nitric oxide-  
25 dependent anaerobic ammonium oxidation. *Nat. Commun.* **10**, 1244 (2019).
- 26 11. van Niftrik, L. & Jetten, M. S. M. Anaerobic Ammonium-Oxidizing Bacteria: Unique  
27 Microorganisms with Exceptional Properties. *Microbiol. Mol. Biol. Rev.* **76**, 585 LP – 596  
28 (2012).
- 29 12. Neumann, S. *et al.* Isolation and characterization of a prokaryotic cell organelle from the  
30 anammox bacterium *Kuenenia stuttgartiensis*. *Mol. Microbiol.* **94**, 794–802 (2014).
- 31 13. Almeida, N. M. De *et al.* Membrane-bound electron transport systems of an anammox

- 1 bacterium : A complexome analysis. *BBA - Bioenerg.* **1857**, 1694–1704 (2016).
- 2 14. Güven, D. *et al.* Propionate Oxidation by and Methanol Inhibition of Anaerobic  
3 Ammonium-Oxidizing Bacteria. *Appl. Environ. Microbiol.* **71**, 1066 LP – 1071 (2005).
- 4 15. Kartal, B. *et al.* Candidatus ‘Anammoxoglobus propionicus’ a new propionate oxidizing  
5 species of anaerobic ammonium oxidizing bacteria. *Syst. Appl. Microbiol.* **30**, 39–49  
6 (2007).
- 7 16. Kartal, B. *et al.* Candidatus ‘Brocadia fulgida’: An autofluorescent anaerobic ammonium  
8 oxidizing bacterium. *FEMS Microbiol. Ecol.* **63**, 46–55 (2008).
- 9 17. Narita, Y. *et al.* Enrichment and physiological characterization of an anaerobic  
10 ammonium-oxidizing bacterium ‘Candidatus Brocadia sapporoensis’. *Syst. Appl.*  
11 *Microbiol.* **40**, 448–457 (2017).
- 12 18. Schouten, S. *et al.* Stable Carbon Isotopic Fractionations Associated with Inorganic  
13 Carbon Fixation by Anaerobic Ammonium-Oxidizing Bacteria. *Appl. Environ. Microbiol.*  
14 **70**, 3785–3788 (2004).
- 15 19. Ali, M. *et al.* Physiological characterization of anaerobic ammonium oxidizing bacterium  
16 ‘Candidatus Jettenia caeni’. *Environ. Microbiol.* **17**, 2172–2189 (2015).
- 17 20. Sweetlove, L. J. & Fernie, A. R. substrate channelling in metabolic regulation. *Nat.*  
18 *Commun.* **9**, 2136 (2018).
- 19 21. Ragsdale, S. W. & Pierce, E. Acetogenesis and the Wood – Ljungdahl pathway of CO<sub>2</sub>  
20 fixation. *Biochim. Biophys. Acta* **1784**, 1873–1898 (2008).
- 21 22. Fuchs, G. Alternative Pathways of Carbon Dioxide Fixation : Insights into the Early  
22 Evolution of Life ? *Annu. Rev. Microbiol.* **65**, 631–658 (2011).
- 23 23. Lieber, D. J. *et al.* A multienzyme complex channels substrates and electrons through  
24 acetyl-CoA and methane biosynthesis pathways in Methanosarcina. *PLoS One* **9**,  
25 e107563–e107563 (2014).
- 26 24. Meyer, P., Cecchi, G. & Stolovitzky, G. Spatial localization of the first and last enzymes  
27 effectively connects active metabolic pathways in bacteria. *BMC Syst. Biol.* **8**, 131 (2014).
- 28 25. Howell, D. M., Xu, H. & White, R. H. ( R )-Citramalate Synthase in Methanogenic  
29 Archaea. *J. Bacteriol.* **181**, 331 LP – 333 (1999).
- 30 26. Li, F., Hagemeyer, C. H., Seedorf, H., Gottschalk, G. & Thauer, R. K. Re -Citrate  
31 Synthase from Clostridium kluveri Is Phylogenetically Related to Homocitrate Synthase

- 1 and Isopropylmalate Synthase Rather Than to Si<sup>2-</sup>-Citrate Synthase. *J. Bacteriol.* **189**,  
2 4299–4304 (2007).
- 3 27. Risso, C., Dien, S. J. Van, Orloff, A., Lovley, D. R. & Coppi, M. V. Elucidation of an  
4 Alternate Isoleucine Biosynthesis Pathway in *Geobacter sulfurreducens*. *J. Bacteriol.* **190**,  
5 2266–2274 (2008).
- 6 28. Tang, Y. J. *et al.* Investigation of Carbon Metabolism in *Dehalococcoides ethenogenes*  
7 Strain 195 by Use of Isotopomer and Transcriptomic Analyses. *J. Bacteriol.* **191**, 5224 LP  
8 – 5231 (2009).
- 9 29. Oshiki, M., Shimokawa, M., Fujii, N., Satoh, H. & Okabe, S. Physiological characteristics  
10 of the anaerobic ammonium-oxidizing bacterium ‘*Candidatus Brocadia sinica*’.  
11 *Microbiology* **157**, 1706–1713 (2011).
- 12 30. Russ, L. *et al.* Genome analysis and heterologous expression of acetate-activating  
13 enzymes in the anammox bacterium *Kuenenia stuttgartiensis*. *Arch. Microbiol.* **194**, 943–  
14 948 (2012).
- 15 31. Spormann, A. M. & Thauer, R. K. Anaerobic acetate oxidation to CO<sub>2</sub> by  
16 *Desulfotomaculum acetoxidans*. *Arch. Microbiol.* **150**, 374–380 (1988).
- 17 32. Schauder, R., Preu, A., Jetten, M. & Fuchs, G. Oxidative and reductive acetyl CoA/carbon  
18 monoxide dehydrogenase pathway in *Desulfobacterium autotrophicum*. *Arch. Microbiol.*  
19 **151**, 84–89 (1989).
- 20 33. Mayer, F. *et al.* AMP-Forming Acetyl Coenzyme A Synthetase in the Outermost  
21 Membrane of the Hyperthermophilic Crenarchaeon *Ignicoccus hospitalis*. *J. Bacteriol.*  
22 **194**, 1572 LP – 1581 (2012).
- 23 34. Young, J. D., Walther, J. L., Antoniewicz, M. R., Yoo, H. & Stephanopoulos, G. An  
24 elementary metabolite unit (EMU) based method of isotopically nonstationary flux  
25 analysis. *Biotechnol. Bioeng.* **99**, 686–99 (2008).
- 26 35. Kato, N., Yurimoto, H. & Thauer, R. K. The Physiological Role of the Ribulose  
27 Monophosphate Pathway in Bacteria and Archaea. *Biosci. Biotechnol. Biochem.* **70**, 10–  
28 21 (2006).
- 29 36. W, F. P., Williams, T. C. R., Sweetlove, L. J. & Ratcliffe, R. G. Capturing Metabolite  
30 Channeling in Metabolic. *Plant Physiol.* **157**, 981–984 (2011).
- 31 37. Bulutoglu, B., Garcia, K. E., Wu, F., Minter, S. D. & Banta, S. Direct Evidence for

- 1 Metabolon Formation and Substrate Channeling in Recombinant TCA Cycle Enzymes.  
2 *ACS Chem. Biol.* (2016). doi:10.1021/acscchembio.6b00523
- 3 38. Speth, D. R., in 't Zandt, M. H., Guerrero-Cruz, S., Dutilh, B. E. & Jetten, M. S. M.  
4 Genome-based microbial ecology of anammox granules in a full-scale wastewater  
5 treatment system. *Nat. Commun.* **7**, 11172 (2016).
- 6 39. Lawson, C. E. *et al.* Metabolic network analysis reveals microbial community interactions  
7 in anammox granules. *Nat. Commun.* **8**, 1–12 (2017).
- 8 40. Winkler, M. K. H. *et al.* Nitrate reduction by organotrophic Anammox bacteria in a  
9 nitrification / anammox granular sludge and a moving bed biofilm reactor. *Bioresour.*  
10 *Technol.* **114**, 217–223 (2012).
- 11 41. Le, T. *et al.* Nitrate residual as a key parameter to efficiently control partial denitrification  
12 coupling with anammox. *Water Environ. Res.* 1–11 (2019). doi:10.1002/wer.1140
- 13 42. Mellbye, B. L. *et al.* Genome-Scale, Constraint-Based Modeling of Nitrogen Oxide Fluxes  
14 during Coculture of *Nitrosomonas europaea* and *Nitrobacter winogradskyi*. *mSystems* **3**,  
15 e00170-17 (2018).
- 16 43. Graaf, A. A. Van De, Bruijn, P. De, Robertson, L. A., Jetten, M. M. & Kuenen, J. G.  
17 Autotrophic growth of anaerobic ammonium-oxidizing micro-organisms in a fluidized bed  
18 reactor. *Microbiology* **142**, 2187–96 (1996).
- 19 44. Su, X., Lu, W. & Rabinowitz, J. D. Metabolite Spectral Accuracy on Orbitraps. *Anal.*  
20 *Chem.* **89**, 5940–5948 (2017).
- 21 45. Yang, W.-C. *et al.* Simultaneous Quantification of Metabolites Involved in Central  
22 Carbon and Energy Metabolism Using Reversed-Phase Liquid Chromatography–Mass  
23 Spectrometry and in Vitro <sup>13</sup>C Labeling. *Anal. Chem.* **80**, 9508–9516 (2008).
- 24 46. Jannasch, A., Sedlak, M. & Adamec, J. Quantification of Pentose Phosphate Pathway  
25 (PPP) Metabolites by Liquid Chromatography-Mass Spectrometry (LC-MS) BT -  
26 Metabolic Profiling: Methods and Protocols. in (ed. Metz, T. O.) 159–171 (Humana Press,  
27 2011). doi:10.1007/978-1-61737-985-7\_9
- 28 47. Kamphorst, J. J. *et al.* Human Pancreatic Cancer Tumors Are Nutrient Poor and Tumor  
29 Cells Actively Scavenge Extracellular Protein. **75**, 544–554 (2015).
- 30 48. Åberg, J. & Wallin, B. Evaluating a fast headspace method for measuring DIC and  
31 subsequent calculation of pCO<sub>2</sub> in freshwater systems. *Inl. Waters* **4**, 157–166 (2014).

- 1 49. Young, J. D. INCA : a computational platform for isotopically non-stationary metabolic  
2 flux analysis. *Bioinformatics* **30**, 1333–1335 (2014).
- 3 50. Ma, F., Jazmin, L. J., Young, J. D. & Allen, D. K. Isotopically nonstationary <sup>13</sup>C flux  
4 analysis of changes in *Arabidopsis thaliana* leaf metabolism due to high light acclimation.  
5 *Proc. Natl. Acad. Sci.* **111**, 16967 LP – 16972 (2014).
- 6 51. Antoniewicz, M. R., Kelleher, J. K. & Stephanopoulos, G. Determination of confidence  
7 intervals of metabolic fluxes estimated from stable isotope measurements. *Metab. Eng.* **8**,  
8 324–337 (2006).
- 9 52. Carnicer, M. *et al.* Macromolecular and elemental composition analysis and extracellular  
10 metabolite balances of *Pichia pastoris* growing at different oxygen levels. *Microb. Cell*  
11 *Fact.* **8**, 65 (2009).
- 12 53. Sachsenberg, T. *et al.* MetaProSIP: Automated Inference of Stable Isotope Incorporation  
13 Rates in Proteins for Functional Metaproteomics. *J. Proteome Res.* **14**, 619–627 (2015).
- 14

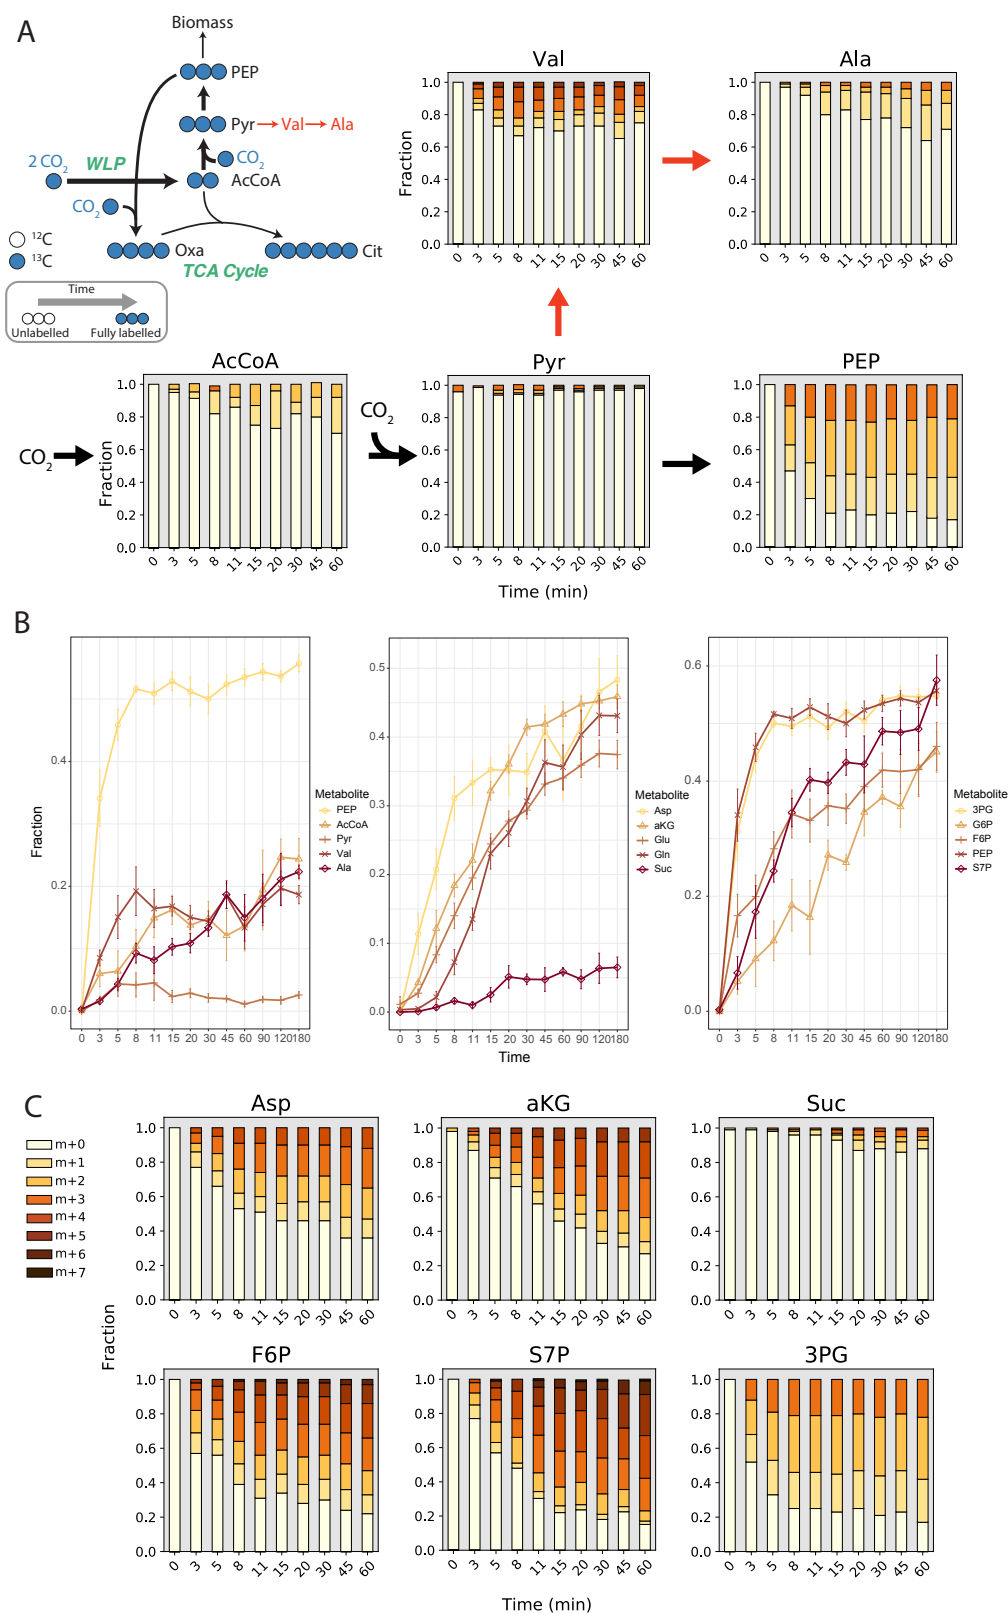

1  
 2 **Figure 1.**  $^{13}\text{C}$ -enrichment of selected metabolites during  $^{13}\text{C}$ -bicarbonate dynamic tracing  
 3 experiments.

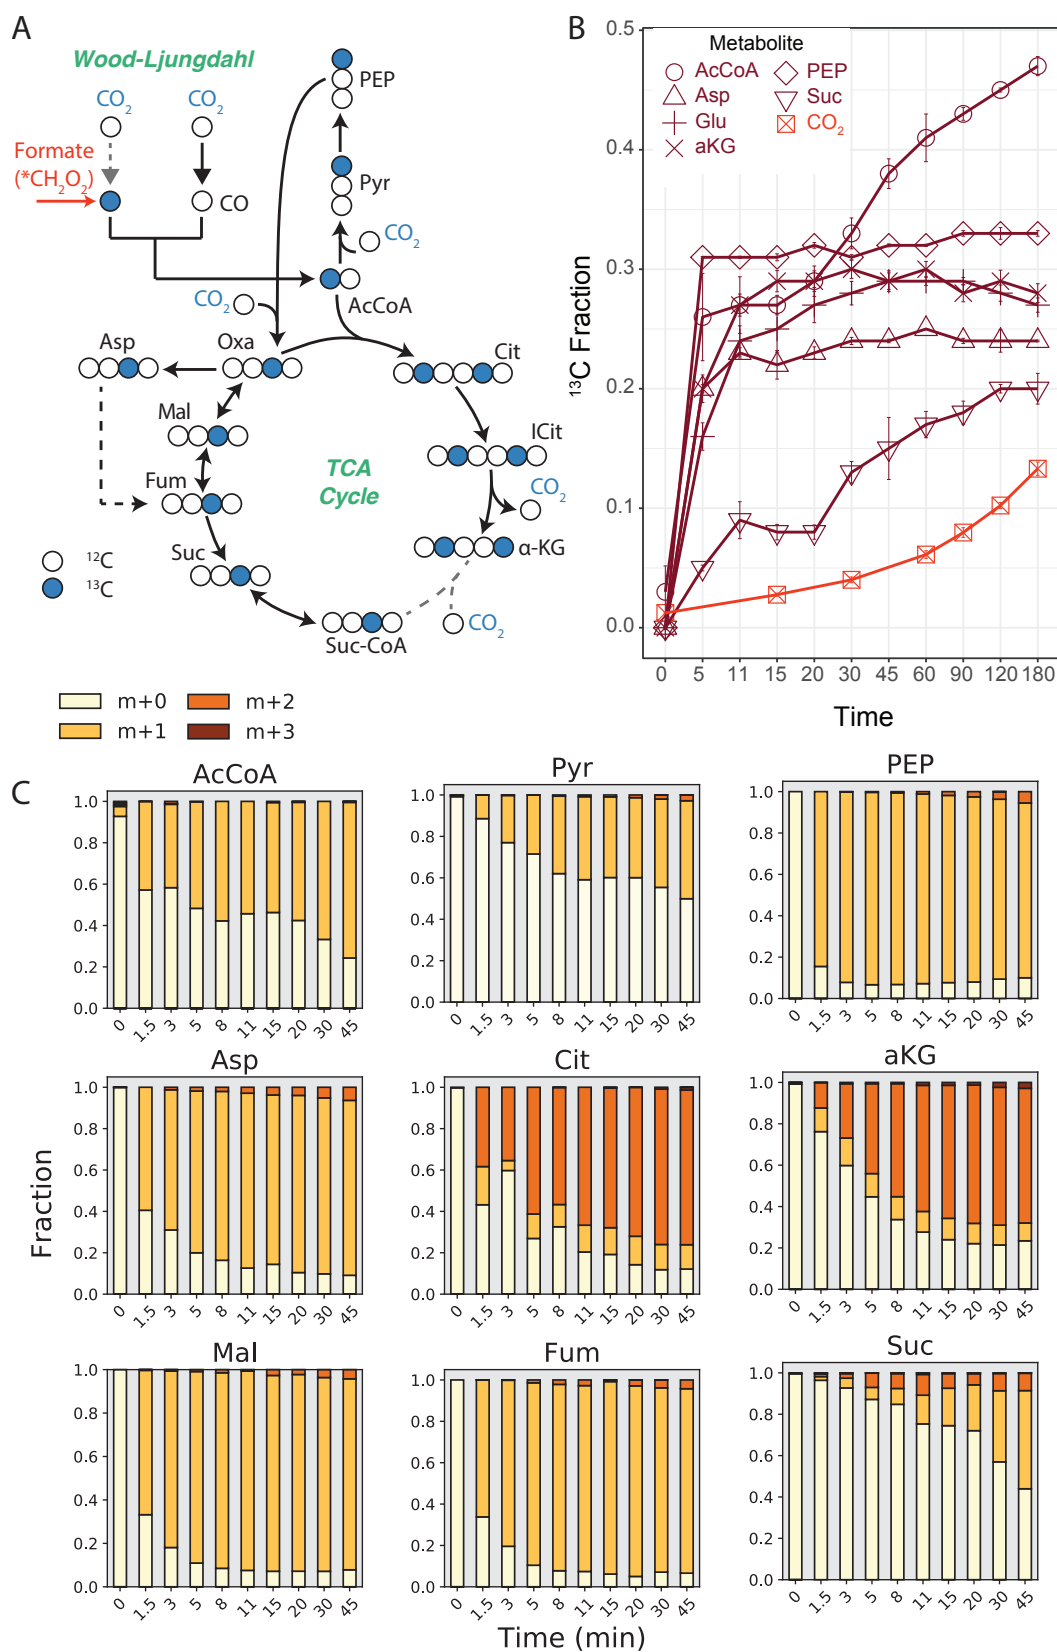



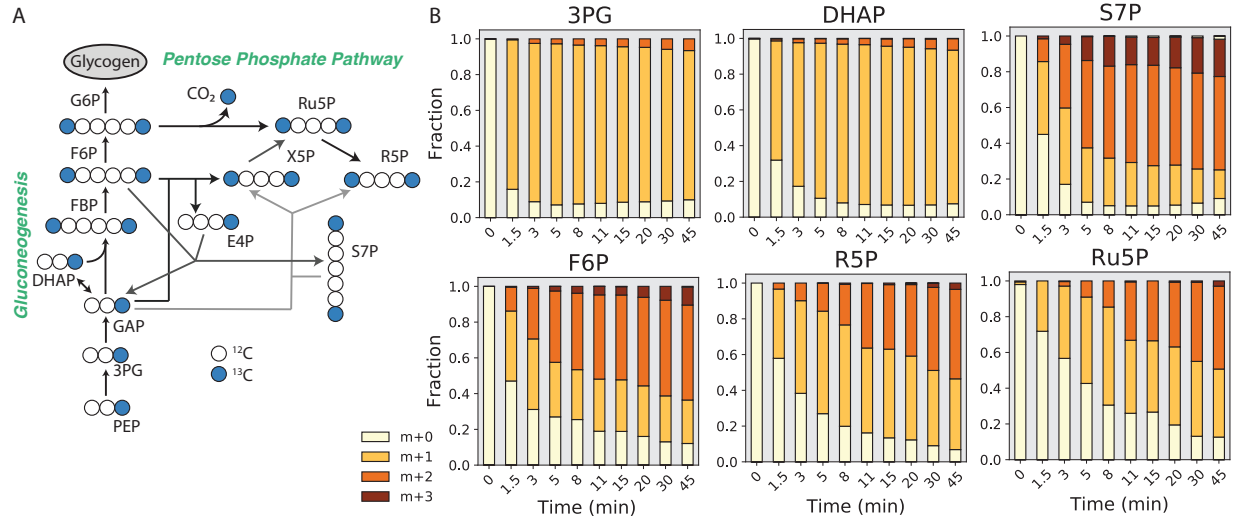

1  
2 **Figure 3.** Operation of gluconeogenesis and pentose phosphate pathway in *K. stuttgartiensis*  
3 revealed by <sup>13</sup>C-formate dynamic labelling experiments.

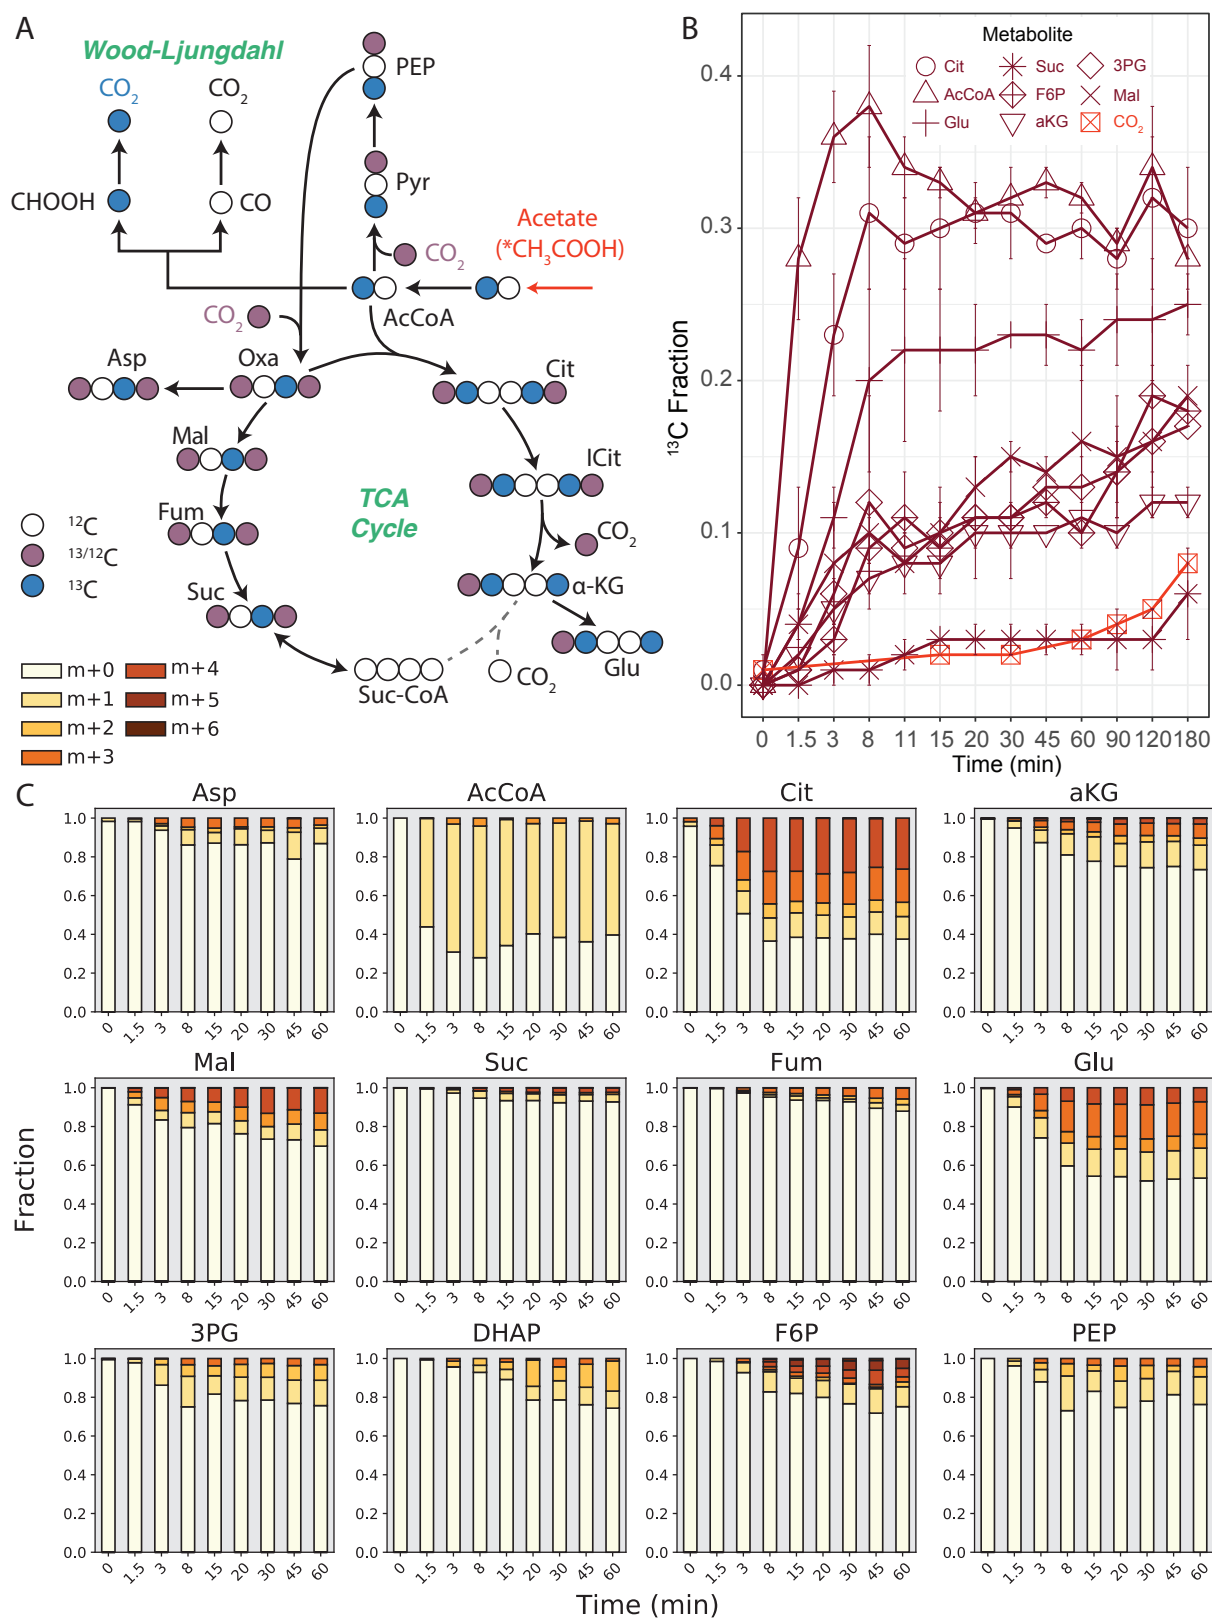

1  
2

**Figure 4.** Reverse Wood-Ljungdahl pathway oxidizes acetate in *K. stuttgartiensis*.

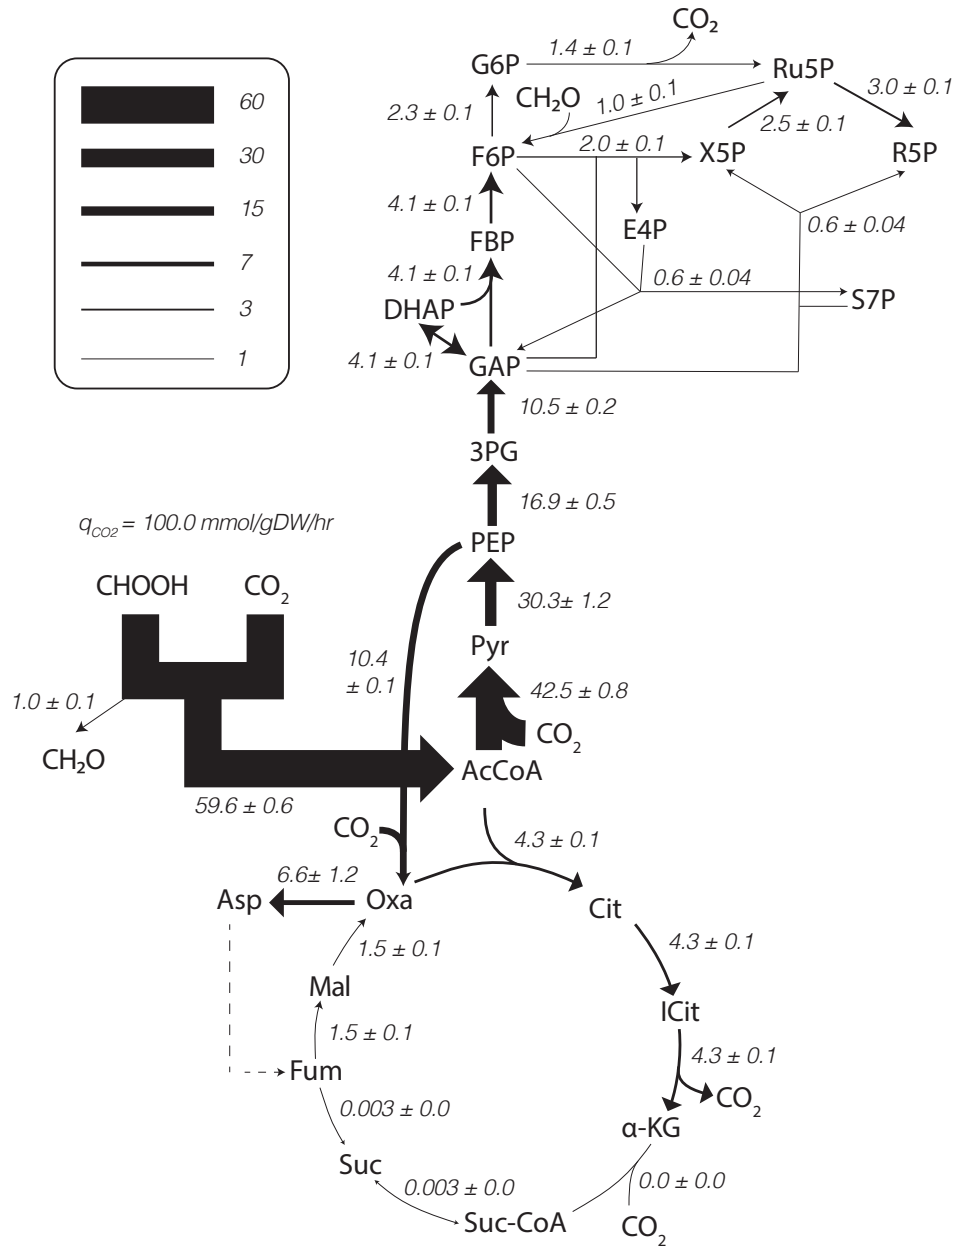

1  
2

**Figure 5.** *K. stuttgartiensis* flux map generated by  $^{13}\text{C}$  INST-MFA.

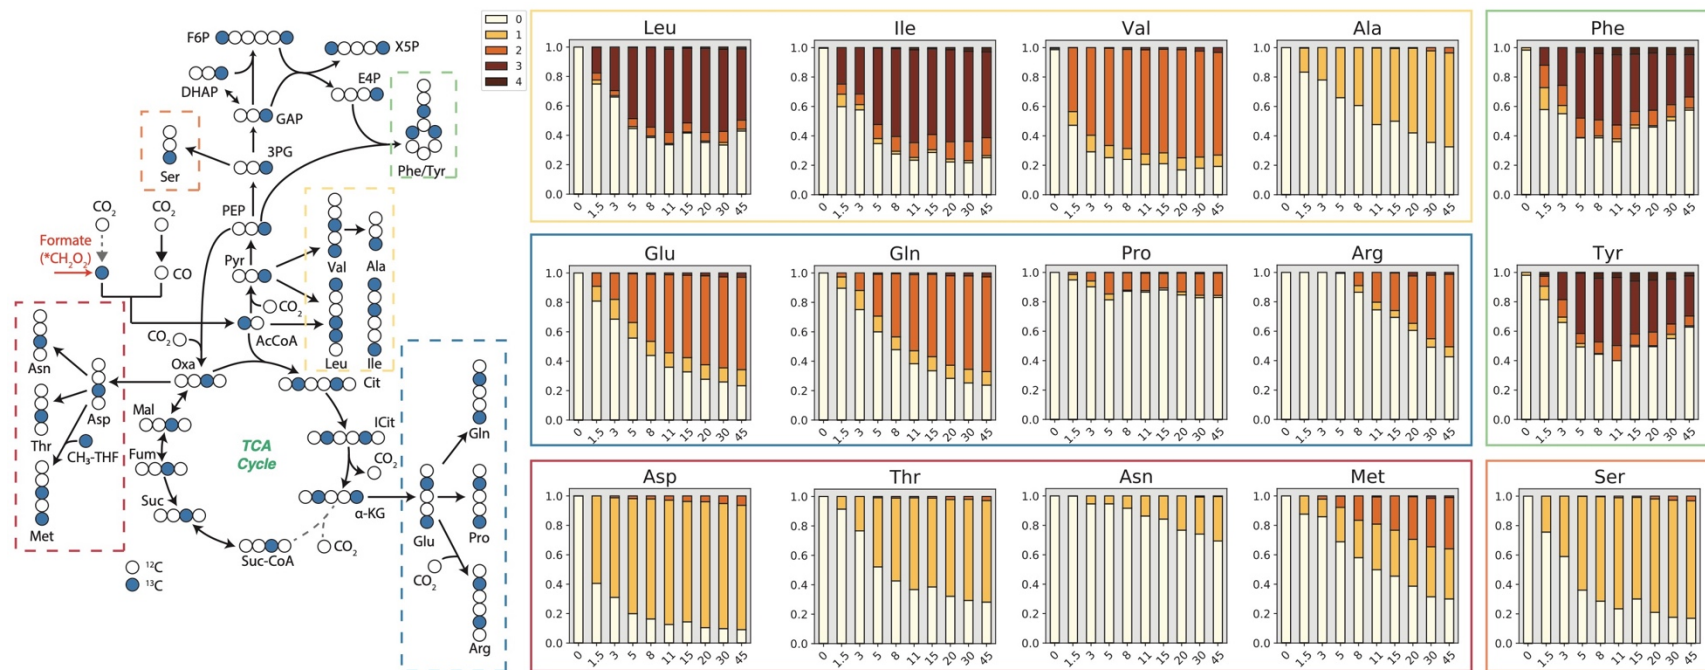

1

2

Supplementary Figure 1. Confirmation of amino acid biosynthetic pathways in *K. stuttgartiensis*.

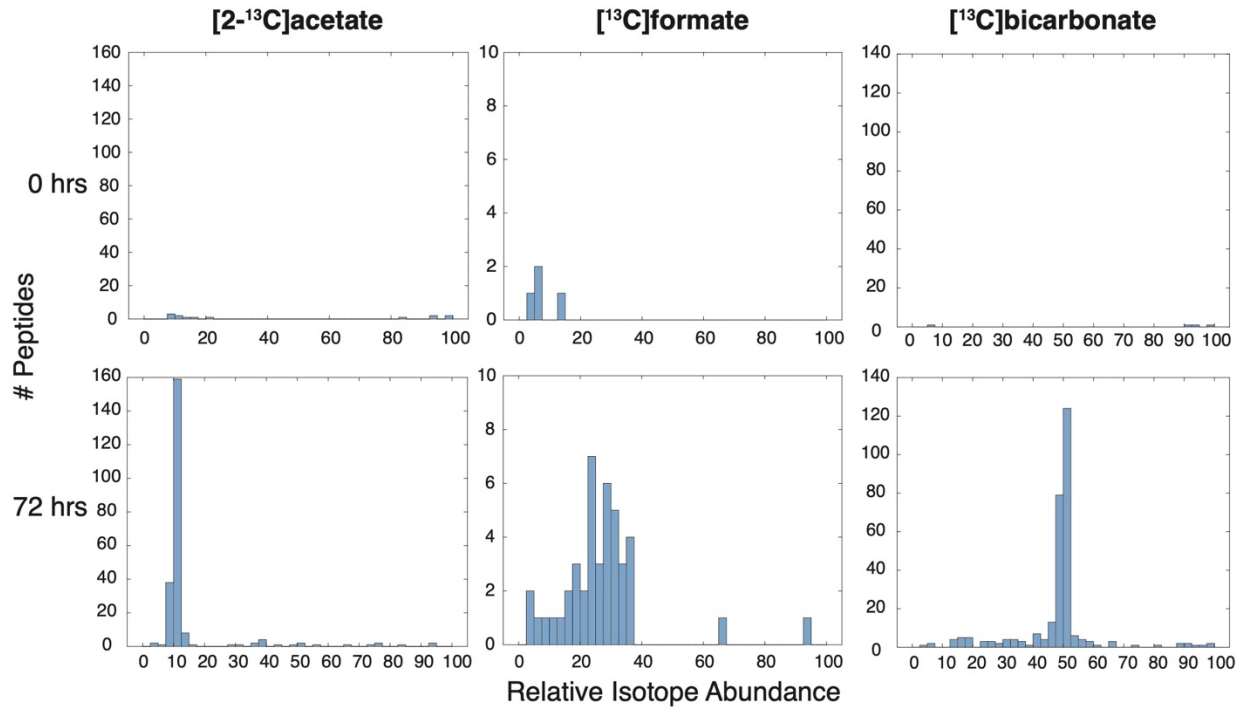

1  
2 **Supplementary Figure 2.** Confirmation of <sup>13</sup>C-labelled substrate incorporation into the proteome  
3 of *K. stuttgartiensis*.

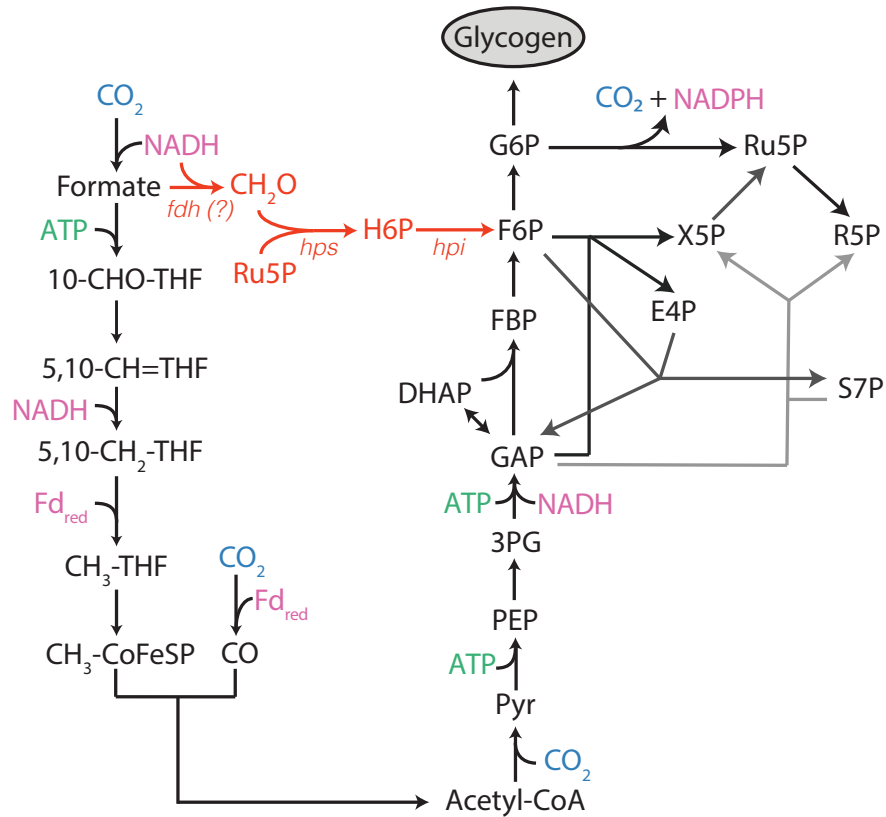

1  
 2 **Supplementary Figure 3.** Proposed synthesis of sugar phosphates from gluconeogenesis and the  
 3 RuMP cycle in *K. stuttgartiensis*.

4

| <b>Amino Acid</b> | <b>Mass (umol/mgDW)</b> | <b>Std Dev (umol/mgDW)</b> |
|-------------------|-------------------------|----------------------------|
| Ala               | 374.6                   | 38.7                       |
| Arg               | 278.9                   | 56.7                       |
| Asp               | 130.0                   | 10.2                       |
| Glu               | 107.5                   | 8.5                        |
| Gly               | 778.8                   | 117.4                      |
| His               | 42.2                    | 7.6                        |
| Ile               | 267.8                   | 43.4                       |
| Leu               | 393.2                   | 55.3                       |
| Lys               | 154.8                   | 44.1                       |
| Met               | 218.9                   | 58.4                       |
| Phe               | 205.4                   | 43.0                       |
| Pro               | 460.0                   | 96.1                       |
| Ser               | 436.5                   | 94.1                       |
| Thr               | 381.0                   | 86.5                       |
| Val               | 438.2                   | 76.2                       |

1

2

**Supplementary Table 1.** *K. stuttgartiensis* biomass amino acid composition.
